# Supplementary material for: Closing Water Cycles in the Built Environment through Nature-Based Solutions: The Contribution of Vertical Greening Systems and Green Roofs
Source: MDPI journal article supplement (doi:10.3390/w13162165), 2021-08-06
Supplement: s1 [file s1]

## SUPPLEMENTARY MATERIALS

**Table S1.** Nature-Based Solutions (NBS) units covered in this study and their commonly-used constituent materials, broken down into types (organic, mineral and synthetic) and specifying their circularity aspects and impacts and benefits.

| NBS Unit                  | Material                                                                        |                                                                                  |                                                                                                                                                                                                                                                          | Material                                                                                                                                                   |                                                                                   |                                                            | Material                                                            |                                                                                                                                                                                                                                                                                |                                                                                                                                                                                                                            | Output                                                                                                |
|---------------------------|---------------------------------------------------------------------------------|----------------------------------------------------------------------------------|----------------------------------------------------------------------------------------------------------------------------------------------------------------------------------------------------------------------------------------------------------|------------------------------------------------------------------------------------------------------------------------------------------------------------|-----------------------------------------------------------------------------------|------------------------------------------------------------|---------------------------------------------------------------------|--------------------------------------------------------------------------------------------------------------------------------------------------------------------------------------------------------------------------------------------------------------------------------|----------------------------------------------------------------------------------------------------------------------------------------------------------------------------------------------------------------------------|-------------------------------------------------------------------------------------------------------|
|                           | Organic (e.g. plant-based)                                                      | CE aspects (recycle, recyclable)                                                 | Impacts and benefits (e.g. energy demand, carbon emissions)                                                                                                                                                                                              | Mineral (e.g. based on soil, clay, lime, metals)                                                                                                           | CE aspects (recycle, recyclable)                                                  | Impacts (e.g. energy demand, carbon emissions)             | Synthetic (e.g plastics)                                            | CE aspects (recycle, recyclable)                                                                                                                                                                                                                                               | Impacts (e.g. energy demand, carbon emissions)                                                                                                                                                                             |                                                                                                       |
| Ground-based green facade | 1# vegetation (ivy, vines, <i>Parthenocisus</i> , wisteria)                     | 1# recyclable (if sustainably managed); locally adapted species and non-invasive | 1# water demand; possibility of reuse appropriately treated wastewater (especially grey) and rainwater; carbon capture and sequestration (more sequestration in the soil due to ground based system); improving the thermal performance of the building; | 1# metal frame and mechanical connectors for mounting (e.g., steel, aluminium, wires)                                                                      | 1# reuse; partially recyclable (reuse or recycling is labor and energy intensive) | 1# highly intensive energy; high carbon emissions          | 1# plastic frame (e.g. PVC, Polyethylene) and mesh (e.g. Polyester) | 1# in general less recycle source material (due to difficulties in processes and waste separation); recyclable (less difficult in terms of waste separation, depending on the type of polymers), take into account the value chain of plastic and ecodesign; not biodegradable | 1# needed for specific treatment and disposal; high environmental impact and energy demand/use on the production; plastic is less recyclable than organic material; plastic degradation due to UV exposure and off-gassing | # Support for climate change mitigation and adaptation with organic materials                         |
|                           | 2# wooden frame – durable & resistance (e.g., pine)                             |                                                                                  |                                                                                                                                                                                                                                                          | 2# soil                                                                                                                                                    |                                                                                   | 2# soil contamination by e.g pesticides, carbon capture    | 2# expanded polystyrene as soil layer substrate                     |                                                                                                                                                                                                                                                                                |                                                                                                                                                                                                                            | # Enriched soil                                                                                       |
|                           | 3# substrate component: cork, wood chips as mulch                               | 2# recycle (sustainable source); recyclable; reuse of elements for the frame     |                                                                                                                                                                                                                                                          | 3# light weight mineral materials:<br>. expanded clay<br>. expanded vermiculite<br>. expanded perlite<br>. arlita<br>. volcanic clay<br>. tuff<br>. pumice | 2# recycle, recyclable depending on soil quality                                  |                                                            |                                                                     |                                                                                                                                                                                                                                                                                |                                                                                                                                                                                                                            | # biomass from pruning                                                                                |
|                           | 4# maintenance inputs (time-based): fertilizer, etc. (qty per year, season etc) | 3# very location depended, recycle, recyclable                                   | 2# long term aesthetics; relative durability; energy demand (depending on source and process); potentially carbon negative (depending of the productive process)<br><br>3# location dependent; potentially carbon negative (depending of the productive  |                                                                                                                                                            | 3# potential for recycle and recyclable                                           | 3# relatively energy consumption depending on the sourcing |                                                                     | 2# potential reuse but difficult due to soil separation process                                                                                                                                                                                                                |                                                                                                                                                                                                                            | # edible plant products<br><br># plant material that can be used in the wall itself as a biocomposite |



|                                |                                               |                                                                                                               |                                                                                                   |                                                                                                                                 |                                      |                                                                                                                       |                                                                                 |                                                                                                                 |  |                                  |
|--------------------------------|-----------------------------------------------|---------------------------------------------------------------------------------------------------------------|---------------------------------------------------------------------------------------------------|---------------------------------------------------------------------------------------------------------------------------------|--------------------------------------|-----------------------------------------------------------------------------------------------------------------------|---------------------------------------------------------------------------------|-----------------------------------------------------------------------------------------------------------------|--|----------------------------------|
|                                |                                               |                                                                                                               | process); promotion of soil aeration and soil quality                                             |                                                                                                                                 |                                      |                                                                                                                       |                                                                                 |                                                                                                                 |  |                                  |
| <b>Wall-based green facade</b> | 1# vegetation                                 |                                                                                                               | 1# possibility of using non-climbing plants but limitation on plants requiring large soil volumes | 1# larger requirement for metals for planters and supporting structure<br><br>2# other mineral substrate rather than local soil |                                      | # due to removal of containers the contribution to the building overall thermal performance and energy efficiency     | 1# larger requirement for plastic both in substrate and supporting system pipes |                                                                                                                 |  |                                  |
| <b>Pot-based green facade</b>  |                                               |                                                                                                               | # possibility of using non-climbing plants but limitation on plants requiring large soil volumes  | # other mineral substrate rather than local soil                                                                                |                                      | # due to removal of the containers the contribution to the building overall thermal performance and energy efficiency |                                                                                 |                                                                                                                 |  |                                  |
| <b>Vegetated pergola</b>       | 1# vegetation<br><br>2# wood frame            | 2# in general recycle and recyclable                                                                          | 1# provides shade for occupied areas<br><br>2# more material required #foundations required       | # metal frame                                                                                                                   | # in general, recycle and recyclable | # more material required<br>#foundations required                                                                     |                                                                                 |                                                                                                                 |  |                                  |
| <b>extensive green roof</b>    | 1# Drainage layer (cork)<br><br>2# Vegetation | 1# recyclable recycle<br><br>2# recyclable (if sustainably managed); locally adapted species and non-invasive | 1&2# Negative carbon<br>1&2# carbon sink<br>#potential cooling device                             | 1# Substrate (expanded clay)<br>2# Substrate (compost)                                                                          | 1# recyclable<br>2# recycle          | # reduce the heat load on the roof and on the building                                                                | 1# Filter layer (textile)<br>2# Drainage layer (HDPE)                           | 1# recyclable<br>2# 100% recycled HDPE<br><br># extended life of the building due to protection by green layers |  | # potentially filtered rainwater |



**Table S2.** Material inputs included in Life-Cycle Inventory for green roofs (GR) in previously published Life-Cycle Assessment (LCA) studies.

| Reference | GR Type               | Related Life Cycle Phase     | GR Layer            | Input Material                                                                                        | Amount per m <sup>2</sup> of GR |
|-----------|-----------------------|------------------------------|---------------------|-------------------------------------------------------------------------------------------------------|---------------------------------|
| [76]      | Extensive / Intensive | Manufacturing / Construction | Root barrier        | Low density polyethylene (recycled and non-recycled)                                                  | 0.46 kg / 0.46 kg               |
|           |                       |                              | Drainage            | Semi-Crystalline polypropylene (recycled and non-recycled)                                            | 14.25 kg / 38.0 kg              |
|           |                       |                              | Water retention     | Polymeric fibers                                                                                      | 9.5 kg / 14.25 kg               |
| [92]      | Lightweight           | Manufacturing / Construction | Protection layer    | Nonwoven polypropylene: lighter / heavier                                                             | 0.3 / 0.5 kg                    |
|           |                       |                              | Drainage layer      | High impact polystyrene: recycled HIPS / virgin HIPS                                                  | 1.30 kg / 1.30 kg               |
|           |                       |                              | Water retention     | Recycled textile fibers / Rockwool (Grodan)                                                           | 1.2 kg / 4.8 kg                 |
|           |                       |                              | Filter layer        | Nonwoven polypropylene: lighter / heavier                                                             | 0.15 kg / 0.2 kg                |
|           |                       |                              | Substrate           | Expanded clay (10%) + Crushed brick (80%) + Compost (10%) / Compost (15%) + sand (15%) + pumice (70%) | 100 kg / 100 kg                 |
| [94]      | Extensive/Intensive   | Construction                 | Waterproof membrane | SBS membrane                                                                                          | 4.0 kg / 5.0 kg                 |
|           |                       |                              | Thermal insulation  | Foam boards                                                                                           | 1.15 kg / 2.88 kg               |
|           |                       |                              |                     | Root barrier                                                                                          | 0.33 kg / 1.12 kg               |



|      |                                                           |              |                                  |                                              |                      |
|------|-----------------------------------------------------------|--------------|----------------------------------|----------------------------------------------|----------------------|
|      |                                                           |              |                                  | Drainage                                     | 2.0 kg / 2.3 kg      |
|      |                                                           |              |                                  | Filter sheet                                 | 0.99 kg / 0.99 kg    |
|      |                                                           |              | Substrate layer                  | Sand                                         | 132.2 kg / 961.2 kg  |
|      |                                                           |              |                                  | Fertilizer                                   | 0.99 kg / 1.59 kg    |
|      |                                                           |              |                                  | Pozzolan                                     | 56.42 kg / 387.0 kg  |
|      |                                                           |              |                                  | Perlite                                      | 28.87 kg / 197.99 kg |
| [98] | Extensive with shallow coarse aggregate mineral substrate | Construction | Waterproof/root-barrier membrane | Double-bitumen, APP                          | 8 kg                 |
|      |                                                           |              | Protection sheet                 | Polypropylene                                | 0.50 kg              |
|      |                                                           |              | Expanded drain membrane          | Polystyrene                                  | 0.95 kg              |
|      |                                                           |              | Filtration sheet                 | Polypropylene PP                             | 0.15 kg              |
|      |                                                           |              | Coarse substrate                 | Aggregate substrate 73 x 0.78 m <sup>3</sup> | 117 kg               |
|      |                                                           |              | Pipe                             | Polyethylene pipe Φ16 1400 m                 | 0.186 kg             |
|      | Extensive with shallow coarse aggregate mineral substrate | Construction | Waterproof- anti-root membrane   | Polyolefin or LDPE                           | 2.20 kg              |



|  |                                                                                                                  |              |                                  |                                              |          |
|--|------------------------------------------------------------------------------------------------------------------|--------------|----------------------------------|----------------------------------------------|----------|
|  |                                                                                                                  |              | Protection sheet                 | Polypropylene                                | 0.30 kg  |
|  |                                                                                                                  |              | Expanded drain membrane          | Polystyrene (Diatherm-60)                    | 0.95 kg  |
|  |                                                                                                                  |              | Filtration sheet                 | Polypropylene PP                             | 0.15 kg  |
|  |                                                                                                                  |              | Coarse substrate                 | Aggregate substrate 73 x 0.78 m <sup>3</sup> | 97.10 kg |
|  |                                                                                                                  |              | Pipe                             | Polyethylene pipe Ø16 1400 m                 | 0.190 kg |
|  | Semi-intensive (at ground floor) and adaptive-extensive (at first floor) with coarse aggregate mineral substrate | Construction | Waterproof/root-barrier membrane | Double-bitumen, APP                          | 8.00 kg  |
|  |                                                                                                                  |              | Protection sheet                 | Polypropylene                                | 0.50 kg  |
|  |                                                                                                                  |              | Expanded drain membrane          | Polystyrene                                  | 0.95 kg  |
|  |                                                                                                                  |              | Filtration sheet                 | Polypropylene PP                             | 0.15 kg  |
|  |                                                                                                                  |              | Coarse substrate                 | Aggregate substrate 73 x 0.78 m <sup>3</sup> | 117 kg   |
|  |                                                                                                                  |              | Pipe                             | Polyethylene pipe Ø16 1400 m                 | 0.186 kg |
|  | Extensive with a 5-cm rockwool as substrate                                                                      | Construction | Waterproof- anti-root membrane   | Polyolefin or LDPE                           | 2.20 kg  |
|  |                                                                                                                  |              | Protection sheet                 | Polypropylene                                | 0.30 kg  |



|      |           |              |                    |                                    |          |
|------|-----------|--------------|--------------------|------------------------------------|----------|
|      |           |              | Drain membrane     | Polypropylene                      | 1.30 kg  |
|      |           |              | Filtration sheet   | Polypropylene PP                   | 0.15 kg  |
|      |           |              | Rockwool substrate | 8 cm deep rockwool substrate       | 12.00 kg |
|      |           |              | Pipe               | Polyethylene pipe $\Phi 16$ 1400 m | 0.186 kg |
| [30] | Extensive | Construction | SBS membrane       | Polyester                          | 0.4 kg   |
|      |           |              | Thermal insulation | Polystyrene foam slab              | 0.012 kg |
|      |           |              | Root barrier       | Polyethylene                       | 0.015 kg |
|      |           |              | Drainage layer     | Polyethylene                       | 0.089 kg |
|      |           |              | Filter sheet       | Polypropylene                      | 0.004 kg |
|      |           |              | Soil               | Solid manure                       | 0.25 kg  |
|      |           |              | Peat               | Peat                               | 0.427 kg |
|      |           |              | Pumice             | Pumice                             | 0.1 kg   |
|      |           |              | Fertilizer         | Nitrogen fertilizer                | 0.001 kg |
|      |           |              | Vegetation         | Sunflower seed                     | 6 plants |



|      |           |              |                                                 |                               |                                 |
|------|-----------|--------------|-------------------------------------------------|-------------------------------|---------------------------------|
| [93] | Extensive | Construction | Support layer                                   | Pine wood                     | 25 kg                           |
|      |           |              | Protection layer                                | Polyethylene                  | 0.76 kg                         |
|      |           |              | Growth substrate layer                          | Soil and compost              | 100 kg and 25 kg                |
|      |           |              | Canopy layer                                    | grass                         | 1 kg                            |
|      | Intensive | Construction | Anti-root barrier                               | Recycled LDPE                 | 0.175 kg                        |
|      |           |              | Drainage and filtration                         | Recycled HIPS                 | 1.252 kg                        |
|      |           |              | Water reserve                                   | Hydrophilic mineral wool      | 6 kg (dry)<br>46 kg (saturated) |
|      |           |              | Mixture of recycled soil and organic fertilizer | Crushed tile / Poultry manure | 200 kg / 50 kg                  |
|      |           |              | Vegetation                                      | Low growth bushes             | 10 kg                           |
| [99] | Extensive | Construction | Roof barrier                                    | PVC                           | 0.016 kg                        |
|      |           |              | Protection layer                                | Polypropylene sheet           | 0.30 kg                         |
|      |           |              | Drainage layer                                  | Polystyrene                   | 1.75 kg                         |
|      |           |              | Filter layer                                    | Polypropylene sheet           | 0.10 kg                         |
|      |           |              | Soil                                            | Gravel / Sand / Kaolin        | 152.2 kg / 12.8 kg /<br>51.3 kg |
|      |           |              | Plant                                           | Sedums                        | 10 kg                           |



|  |           |              |                  |                             |                               |
|--|-----------|--------------|------------------|-----------------------------|-------------------------------|
|  | Intensive | Construction | Roof barrier     | HDPE                        | 0.385 kg                      |
|  |           |              | Protection layer | Polypropylene sheet         | 0.60 kg                       |
|  |           |              | Drainage layer   | Gravel / Bentonite / Kaolin | 76.1 kg / 20 kg /<br>25.63 kg |
|  |           |              | Filter layer     | Polypropylene sheet         | 0.60 kg                       |
|  |           |              | Soil             | Gravel / Sand / Kaolin      | 1522 kg / 128 kg /<br>513 kg  |
|  |           |              | Plant            | Up to 3000 mm               | 30 kg                         |

**Table S3.** Material inputs included in Life-Cycle Inventory for vertical greening systems (VGS) in previously published Life-Cycle Assessment (LCA) studies.

| Reference | VGS Type                                                                                                                      | Related Life Cycle Phase     | VGS Layer                   | Input Material                                                                                               | Amount per m <sup>2</sup> of VGS |
|-----------|-------------------------------------------------------------------------------------------------------------------------------|------------------------------|-----------------------------|--------------------------------------------------------------------------------------------------------------|----------------------------------|
| [109]     | System S1 is made of HDPE modules supported on a steel structure                                                              | Production of VGS components | Fastening components        | Steel S235                                                                                                   | 5.21 kg                          |
|           |                                                                                                                               |                              | Vegetation support elements | HDPE                                                                                                         | 13.20 kg                         |
|           |                                                                                                                               |                              | Substrate                   | Potting soil                                                                                                 | 75.60 kg                         |
|           |                                                                                                                               |                              | Vegetation                  | Pteropsida                                                                                                   | 8.00 kg                          |
|           |                                                                                                                               |                              | Irrigation system           | PE                                                                                                           | 0.26 kg                          |
|           | System S2 consists of modules comprising an underlayer made of alkali-activated precast slab and a top layer of expanded cork | Production of VGS components | Fastening components        | Stainless steel                                                                                              | 3.20 kg                          |
|           |                                                                                                                               |                              | Vegetation support elements | Mine waste mud; Milled waste glass; Black cork granules<br>Sodium silicate; Sodium hydroxide; ICB Glue; EPDM | 24.40 kg                         |



|  |                                                                                                                                |                              |                             |                                     |          |
|--|--------------------------------------------------------------------------------------------------------------------------------|------------------------------|-----------------------------|-------------------------------------|----------|
|  | agglomerate, fixed to the façade using a stainless-steel structure                                                             |                              | Substrate                   | Light weight substrate              | 29.70 kg |
|  |                                                                                                                                |                              | Vegetation                  | <i>Sedum album</i>                  | 5.90 kg  |
|  |                                                                                                                                |                              | Irrigation system           | PE                                  | 0.80 kg  |
|  | System S3 uses HDPE planter boxes supported on a structure made of stainless steel and galvanized iron                         | Production of VGS components | Fastening components        | Stainless steel; Galvanized iron    | 40.50 kg |
|  |                                                                                                                                |                              | Vegetation support elements | HDPE                                | 6.00 kg  |
|  |                                                                                                                                |                              | Substrate                   | Sandy soil; Expanded clay aggregate | 3.60 kg  |
|  |                                                                                                                                |                              | Vegetation                  | <i>Peperomia claviformis</i>        | 18.00 kg |
|  |                                                                                                                                |                              | Irrigation system           | PE                                  | 0.50 kg  |
|  | System S4 consists of plastic modules supported on an aluminium structure and other layers made of polyester and polypropylene | Production of VGS components | Fastening components        | Aluminium                           | 0.60 kg  |
|  |                                                                                                                                |                              | Vegetation support elements | Polyester; PP                       | 2.09 kg  |
|  |                                                                                                                                |                              | Substrate                   | Coconut fibre; Turf; Humus          | 4.00 kg  |
|  |                                                                                                                                |                              | Vegetation                  | <i>Hedera helix</i> stems           | 1.50 kg  |



|      |                                                                                    |                                                              |                             |                                        |                   |
|------|------------------------------------------------------------------------------------|--------------------------------------------------------------|-----------------------------|----------------------------------------|-------------------|
|      |                                                                                    |                                                              | Irrigation system           | PE                                     | 0.52 kg           |
|      | System S5 is based on felt material with gaps, supported on an aluminium structure | Production of VGS components                                 | Fastening components        | Aluminium                              | 3.90 kg           |
|      |                                                                                    |                                                              | Vegetation support elements | PP; Viscose; Polycarbonate             | 5.68 kg           |
|      |                                                                                    |                                                              | Substrate                   | Raw soil; SAP; Coco-coir; Peat moss    | 2.10 kg           |
|      |                                                                                    |                                                              | Vegetation                  | Lonicera n. stems                      | 1.66 kg           |
|      |                                                                                    |                                                              | Irrigation system           | PE                                     | 0.52 kg           |
| [29] | Direct facade greening system + bare wall                                          | Construction/Maintenance/Disposal of 1 m <sup>2</sup> facade | Vegetation                  | <i>Hedera helix</i>                    | 5.5 kg            |
|      | Indirect facade greening + bare wall                                               | Construction/Maintenance/Disposal of 1 m <sup>2</sup> facade | Structural support          | Stainless steel / Stainless steel mesh | 0.06 kg / 1.55 kg |
|      |                                                                                    |                                                              | Vegetation                  | <i>Hedera helix</i>                    | 2.7 kg            |
|      | Living wall system (LWS) based on                                                  | Construction/Maintenance/Disposal of 1 m <sup>2</sup> facade | Structural support          | Steel S235                             | 5.205 kg          |



|  |                                                           |                                                              |                      |                     |          |
|--|-----------------------------------------------------------|--------------------------------------------------------------|----------------------|---------------------|----------|
|  | planter boxes filled with soil + bare wall                |                                                              | Supporting system    | HDPE boxes          | 13.2 kg  |
|  |                                                           |                                                              | Growing material     | Potting soil        | 75.6 kg  |
|  |                                                           |                                                              | Vegetation           | Pteropsida          | 8 kg     |
|  |                                                           |                                                              | Irrigation system    | PE Pipes            | 0.26 kg  |
|  | Living wall system (LWS) based on felt layers + bare wall | Construction/Maintenance/Disposal of 1 m <sup>2</sup> facade | Structural support   | Steel S235          | 0.32 kg  |
|  |                                                           |                                                              | Supporting U section | Steel S235          | 4.62 kg  |
|  |                                                           |                                                              | Supporting system    | PVC foam plate      | 7 kg     |
|  |                                                           |                                                              | White fleece         | Polypropylene       | 0.3 kg   |
|  |                                                           |                                                              | Wool fleece          | Polyamide           | 0.6 kg   |
|  |                                                           |                                                              | PE fleece            | Polyethylene (LDPE) | 0.045 kg |
|  |                                                           |                                                              | Black fleece         | Polypropylene       | 0.27 kg  |
|  |                                                           |                                                              | Vegetation           | Pteropsida          | 7.5 kg   |



|      |                                                                                         |                                                                                         |                                  |                                                                |                   |
|------|-----------------------------------------------------------------------------------------|-----------------------------------------------------------------------------------------|----------------------------------|----------------------------------------------------------------|-------------------|
|      |                                                                                         |                                                                                         | Irrigation system                | PE Pipes                                                       | 0.09 kg           |
| [88] | Living wall system based on planter boxes                                               | Manufacture construction and maintenance                                                | External finishing layer         | Polyester                                                      | 0.25 kg           |
|      |                                                                                         |                                                                                         | Bearing structure                | Polypropylene boxes                                            | 1.34 kg           |
|      |                                                                                         |                                                                                         | Hydrophilic layer                | Polyester                                                      | 0.25 kg           |
|      |                                                                                         |                                                                                         | Growing medium                   | Coconut fibre, turf and hummus                                 | 4 kg              |
|      |                                                                                         |                                                                                         | Closing layer                    | Polyester                                                      | 0.25 kg           |
|      |                                                                                         |                                                                                         | Hooking system                   | Aluminium                                                      | 0.6 kg            |
|      |                                                                                         |                                                                                         | Vegetation layer                 | <i>Hedera helix</i> stems                                      | 1.5 kg            |
|      | Living wall system made with felt layers                                                | Manufacture construction and maintenance                                                | External finishing layer         | Polypropylene fibre and non-woven geotextile                   | 0.53 kg           |
|      |                                                                                         |                                                                                         | Bearing structure                | Aluminium alloy                                                | 3.9 kg            |
|      |                                                                                         |                                                                                         | Hydrophilic layer                | Non-woven viscose fabrics                                      | 1.15 kg           |
|      |                                                                                         |                                                                                         | Growing medium containment layer | Polypropylene monofilament geomat-grid                         | 2 kg              |
|      |                                                                                         |                                                                                         | Growing medium                   | 50% of raw soil; 30% of SAP; 15% of coco-coir; 5% of peat moss | 2.1 kg            |
|      |                                                                                         |                                                                                         | Closing layer                    | Alveolar polycarbonate in Lexan resin                          | 2 kg              |
|      |                                                                                         |                                                                                         | Vegetation layer                 | Lonicera n. stems                                              | 1.66 kg           |
| [89] | The trellis system is composed of evergreen climbing plants and a stainless steel frame | Manufacturing, constructing, maintaining and disposing of 1 m <sup>2</sup> living walls | Structural support               | Stainless steel/Stainless steel mesh                           | 0.06 kg / 1.55 kg |
|      |                                                                                         |                                                                                         | Vegetation                       | <i>Hedera helix</i>                                            | 2.7 kg            |



|       |                                               |                                                                                                      |                              |                                      |                          |
|-------|-----------------------------------------------|------------------------------------------------------------------------------------------------------|------------------------------|--------------------------------------|--------------------------|
|       | The planter box living wall system            | Manufacturing, constructing, maintaining and disposing of 1 m <sup>2</sup> living walls              | Structural support           | Stainless steel                      | 5.205 kg                 |
|       |                                               |                                                                                                      | Planter boxes                | HDPE                                 | 13.2 kg                  |
|       |                                               |                                                                                                      | Growing material             | Potting soil                         | 75.6 kg                  |
|       |                                               |                                                                                                      | Vegetation                   | Pteropsida                           | 8 kg                     |
|       |                                               |                                                                                                      | Watering system              | PE                                   | 0.26 kg                  |
|       | The felt layer living wall system             | Manufacturing, constructing, maintaining and disposing of 1 m <sup>2</sup> living walls              | Structural support           | Stainless steel                      | 4.94 kg                  |
|       |                                               |                                                                                                      | Foam plate                   | PVC                                  | 7 kg                     |
|       |                                               |                                                                                                      | White/Black fleece           | Polypropylene                        | 0.3 kg / 0.27 kg         |
|       |                                               |                                                                                                      | Wool fleece                  | Polyamide                            | 0.6 kg                   |
|       |                                               |                                                                                                      | PE fleece                    | Polyethylene                         | 0.045 kg                 |
|       |                                               |                                                                                                      | Vegetation                   | Pteropsida                           | 7.5 kg                   |
|       |                                               |                                                                                                      | Watering system              | PE                                   | 0.09 kg                  |
| [90]  | Living wall system (LWS) based on felt layers | Manufacture, transportation, use, and disposal of 1 m <sup>2</sup> living walls                      | Felt pockets & root wrappers | Recycled PET bottles                 | 2.3 kg                   |
|       |                                               |                                                                                                      | Backing board                | HDPE                                 | 4.1 kg                   |
|       |                                               |                                                                                                      | Screws & washers             | Stainless steel                      | 0.128 kg                 |
|       |                                               |                                                                                                      | Plants                       | <i>Liriope muscari</i>               | 17 kg                    |
| [100] | Vertical Greenery System (VGS)                | Raw material depletion and transportation, operation, recycling and disposal of 1 m <sup>2</sup> VGS | Planter boxes                | HDPE                                 | 6.0 kg                   |
|       |                                               |                                                                                                      | Growing materials            | Sandy soil & Expanded clay aggregate | 1.8 kg + 1.8 kg = 3.6 kg |
|       |                                               |                                                                                                      | Vegetation                   | <i>Peperomia claviformis</i>         | 18.0 kg                  |



|      |                         |                                             |                                    |                                                                                                                                                                                        |                                                 |
|------|-------------------------|---------------------------------------------|------------------------------------|----------------------------------------------------------------------------------------------------------------------------------------------------------------------------------------|-------------------------------------------------|
|      |                         |                                             | Bolts & Angle bars                 | Stainless steel                                                                                                                                                                        | 10.5 kg                                         |
|      |                         |                                             | Square tubes                       | Galvanized iron                                                                                                                                                                        | 30.0 kg                                         |
| [95] | Geogreen modular system | Transport, production, construction and use | Watering system tubes & Drip lines | Polyethylene (LDPE)                                                                                                                                                                    | 0.5 kg                                          |
|      |                         |                                             | Support                            | Alkaline activated board:<br>Panasqueira mine waste mud<br>Milled waste glass<br>Black cork granules<br>Sodium silicate<br>Sodium hydroxide                                            | 10.5 kg<br>1.7 kg<br>0.7 kg<br>2.7 kg<br>1.7 kg |
|      |                         |                                             |                                    | Expanded black cork board:<br>Expanded cork board<br>Fixing glue: Neoprene glue<br>Fastening: Stainless steel anchorage HILTY HUB-H8 +<br>47 mm circular face<br>stainless steel plate | 6.5 kg<br>0.5 kg<br>3.2 kg                      |
|      |                         |                                             | Greening                           | Substrate: Light weight substrate (Sirorooft)<br>Plants: Sedum album<br>Waterproofing: EPDM membrane<br>(2 layers)<br>Irrigation system:<br>Polyethylene tubes                         | 29.7 kg<br>5.9 kg<br>0.1 kg<br>0.8 kg           |
